# Supplementary material for: Development of measurable indicators to enhance public health evidence-informed policy-making
Source: Springer Nature journal article supplement (doi:10.1186/s12961-018-0323-z), 2018-05-31
Supplement: MOESM1 [file 15809256]

# Selected Delphi panel

FROM 6 EU COUNTRIES

DK

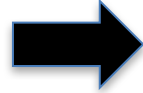

Researchers:6

Policy makers:6

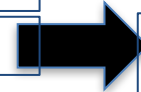

National level:2  
Regional level:1  
Local level:3

FIN

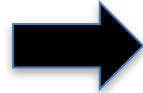

Researchers:6

Policy makers:6

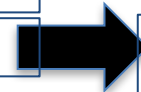

National level:5  
Regional level:1  
Local level:-

IT

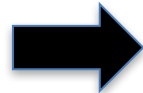

Researchers:6

Policy makers:6

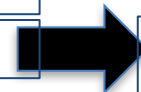

National level:1  
Regional level:1  
Local level:4

NL

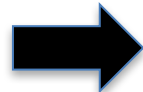

Researchers:7

Policy makers:5

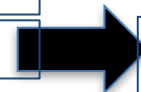

National level:2  
Regional level:-  
Local level:3

RO

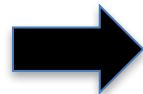

Researchers:6

Policy makers:6

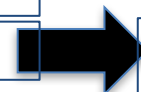

National level:4  
Regional level:2  
Local level: -

UK

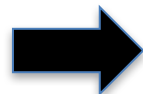

Researchers:6

Policy makers:6

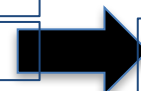

National level:5  
Regional level:1  
Local level:-

FROM INTERNATIONAL ORGANIZATIONS

INT

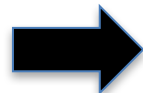

Researchers:4

Policy makers:6

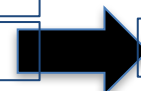

International level
