# Supplementary material for: Development of measurable indicators to enhance public health evidence-informed policy-making
Source: Springer Nature journal article supplement (doi:10.1186/s12961-018-0323-z), 2018-05-31
Supplement: MOESM2 [file 15809256]

# 1. Stakeholders working on the policy

## 1<sup>st</sup> round ratings (frequencies):

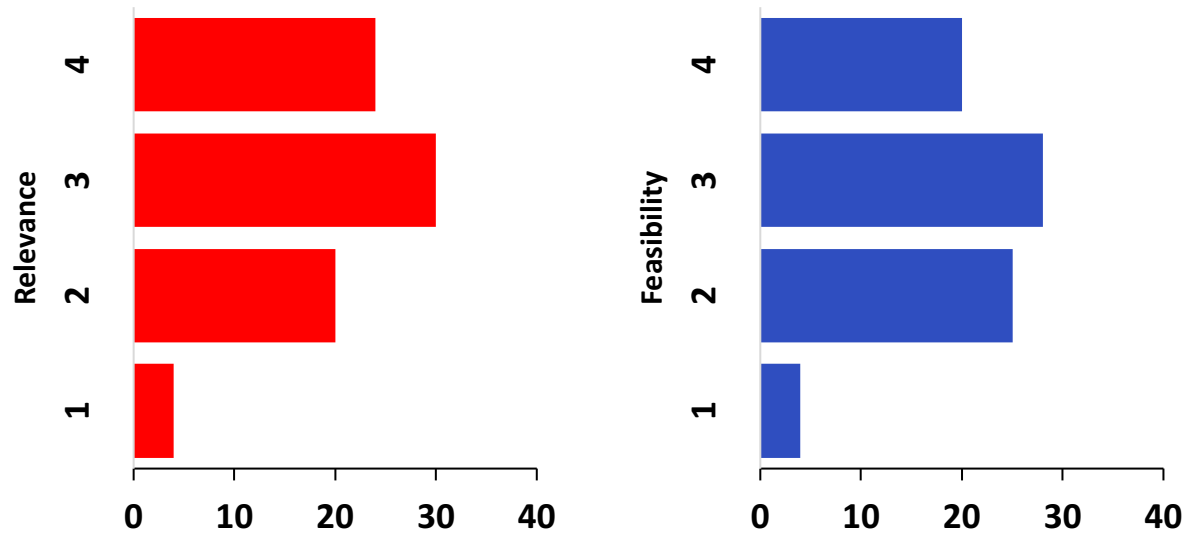

### Summary of 1<sup>st</sup> round comments:

- stakeholders involvement in policy making is crucial in order to produce relevant policies and to implement them.
- stakeholders involvement may be problematic as they may not be qualified for their role and responsibility in the policy and as they may just push own interests.

Please rate again the relevance (how much the indicator is fit to infer the use of EIPM) and feasibility (how much the indicator is actually measurable). From 4 (max) to 1 (min). \*

Please choose the appropriate response for each item:

|                                    | Relevance             |                       |                       |                       | Feasibility           |                       |                       |                       |
|------------------------------------|-----------------------|-----------------------|-----------------------|-----------------------|-----------------------|-----------------------|-----------------------|-----------------------|
|                                    | 4                     | 3                     | 2                     | 1                     | 4                     | 3                     | 2                     | 1                     |
| Stakeholders working on the policy | <input type="radio"/> | <input type="radio"/> | <input type="radio"/> | <input type="radio"/> | <input type="radio"/> | <input type="radio"/> | <input type="radio"/> | <input type="radio"/> |

### GLOSSARY

**Stakeholders:** people and entities with interests in the policy, except the researchers, separately considered. E.g. enterprises, NGOs, associations (of patients, of citizens, of consumers...), other institutions (municipalities, health units...), practitioners (technicians, consultants...)
